# Supplementary material for: Detection of a secreted metalloprotease within the nuclei of liver cells
Source: Royal Society of Chemistry journal article supplement (doi:10.1039/c0mb00303d), 2011-04-11
Supplement: c0mb00303d.pdf [file c0mb00303d.pdf]

## Figure S1: Nuclear Localization Signal

|              |                         |     |                                                           |     |
|--------------|-------------------------|-----|-----------------------------------------------------------|-----|
| gi 21265034  | [Homo sapiens]          | 29  | ----PSHFQQSCLQALEPQAVSSYLSPGAPLKGRPPSPGFQRQRQRRAAGGILHL   | 82  |
| gi 109109894 | [Macaca mulatta]        | 13  | ----VKEWFGACEESLP-----                                    | 26  |
| gi 76671947  | [Bos taurus]            | 27  | ----PSPGCVCCKHGPRLSALP-----APSPGRPLAPLRRRAAGHVLHL         | 68  |
| gi 47604978  | [Mus musculus]          | 33  | ----LSDFQKSLLDLEPKDVSSYFG--HHAAPFTGHPPSHLQRLRRRRTLEDILHL  | 84  |
| gi 109467944 | [Rattus norvegicus]     | 33  | ----LSDFQKSFLLDLEPKDLSSSFS--RHTAPLTGHPPSHLQRLRQRRTLEDILHL | 84  |
| gi 126297969 | [Monodelphis domestica] | 150 | KQLYIQPLKSEHWNLLPDCCRAQPHLIHKAMRAAGAPQVHRLSARISKRALGSKVHL | 207 |
| gi 118099369 | [Gallus gallus]         | 8   | -----HFAPRLQKRAAGAVKHL                                    | 25  |

## Figure S2: Sequence alignment of CUB-2 domain homologs

| Mapped Residues                |      | *                                                                                                                                      | * * * *                                                                    | * * * *          |                                                    |
|--------------------------------|------|----------------------------------------------------------------------------------------------------------------------------------------|----------------------------------------------------------------------------|------------------|----------------------------------------------------|
| 291243359_Sko_LOC100378044     | 1828 | -----SGVISSLNYPNPYP--INTNLTIIVRGPQDSHIIIVTF--EGCLMTGSAHCAKSLRVVNYLL--YSERREIGQIMCGDECNITTED-----                                       | VLTVQSTLNTLFI                                                              | IEFVSHD----      | FELEGFQARYRV                                       |
| 189236895_Tca_C3po             | 3059 | -----EAGCGGKIVLNKTMTLEAPNLADMDCLEWTIQSQIDTTVKIHFDELNLPS-----                                                                           | SCAALEVRDG--                                                               | HPGVGLIERFCG     | ITDTHYS-----REITTSGNVM-----                        |
| 241164816_Isc_IscW_ISCW002397  | 220  | -----TAGAGAIASPGFAEQRLPANRKCQWEIQAEAGHQVKAFAFRLRLEPHRLGG--EAPHLVYFDG--DENTPLANL                                                        | SAVQIEEGESP-----                                                           | LNVTTVSSKLLV     | LVLLTGTRL-----EDAVMYMEYAANPS                       |
| 221129558_Hma_LOC100208297     | 399  | -----NPSDDTACSELVKPTGYINVIKP--KN--CTWNIITVPVKLVEIFIIINIDMADDDPC--HSEIEVRD--                                                            | YVNAPLLFR                                                                  | TCGQKSKPIL-----  | TSSNTAFIQHMLNT-----SRLSFLKLFQAVD                   |
| 31615702_Rno_Masp2             | 8    | -----SKWPEPVGRLVSPGFPEKYG--NHQDRSWTLAPPGRFLRLYFTHFNLELSYRC--EYDFVKLTS--                                                                | GTKVLATL                                                                   | CGQESTDTERAP---- | GNDTFYSLGPSLKVTFHSDYSNEK----                       |
| 290447443_Cel_Y69H2.17         | 35   | SACECLDRIVLLHNFQDFRLISSPNYPEAYC--TGMDCWHHFVAPNAGQKVFHSTDNLDIRK----                                                                     | NLDQILFYD--                                                                | FKTSQLEN         | STESFRCTGDD-----LCYYSKFKQVLTIRFKTQ----             |
| 115764766_Spu_LOC756506        | 607  | YECCDPGCGIQEPFATSATGNFLENFGDSNAAPFVSVCTWITLPEGHFIFNFTEFDVKRDVESGACVDSVEIFPTEHRWDEGRSRHVFCGQGAAYV-----                                  | MTNVSSVT                                                                   | VI               | FGTGLD-----GSSGFQVYASKAV                           |
| 260797195_Bfl_BRAFLDRAFT_88162 | 377  | SKGQPLPPCGGYLEGSRNGTITSPNFPSSAHT--PLECWTIRNPKPGRHYIYVYLLQNYLSC----                                                                     | QSSALTYLEY--                                                               | QSVSNL           | TDSYIYSSNFNSRNDCCGSLHRIRSSKAF                      |
| 115665188_Spu_LOC576545        | 174  | EDEDEDETECKGT----GGIIMSKNYFNDYG--EDLQHTWTIITRLWTKVLFTFIEIDVYSPEDDC--                                                                   | GDDYVNV                                                                    | SVS--            | GEHKVYCKVPGKSAVVESSG-----NVMQIEFYSDVQYTI----       |
| 21265034_Hsa_ADAMTS13          | 1290 | LAPETFYRECDMQLFGPWGEIVSPSLSPATR--NAGGCRLFINVAPHARIAIHALATNMGAGTEGA--                                                                   | NASYIL                                                                     | IRD--            | HSLRTTAFHGQQLVWYSES-----SQAEMFSEGFLKAK-----        |
| 296191110_Cja_ADAMTS13         | 1270 | -APETFYRECDMQLFGPWGEIVSPSLSPATR--NAGGCRLFINVAPHARIAIHALATNMGAGTEGA--                                                                   | NASYIS                                                                     | IRD--            | HSLRTTFRGQQLVWYSES-----SQAEMFSEAFLEAK-----         |
| 301770673_Ame_ADAMTS13         | 1368 | -APGTPHRCDMQLFGPWGEIVSPSPSPNGS--NSGGCRIFINVAPQARIAIHALVTDVGTGTG--                                                                      | ASYIS                                                                      | IRD--            | HSLKTMFRGQQLVWYSEG-----SQAEMFSSQGLEAH-----         |
| 76671947_Bta_ADAMTS13          | 1272 | -ALGAFHRCDMQLFGPRGEIVSPSPSPDGR--NVGGCRIFINVAPWARIAIHALTVDSGTRAEGT--                                                                    | DASYIL                                                                     | IRD--            | HSLRTTAFRQQLVWYSEG-----SQAEMFSSQGLEAH-----         |
| 291416170_Ocu_ADAMTS13         | 1094 | -APQP--YRECDVQLFGPRGEIVSPSPSAHGG--RAGGCRLFISVAPQARIAIHALAAGTAPGTEGA--                                                                  | HSWST                                                                      | TA               | FRGQQLVWYSESG-----SQAEVEFSQGLEAG-----              |
| 47604978_Mmu_ADAMTS13          | 1295 | -APGTIFYKCDRQLFGPRGEIVSPSLSPDGR--KAGTCRVFISVAPQARIAIHALASDMGTASEGT--                                                                   | NANYVS                                                                     | IRD--            | HSLRTTFRGQQLVWYSEG-----SEAELEFSPGLEAH-----         |
| 126297969_Mdo_LOC100018539     | 1413 | VATENYHKECDVQLFGPRGEIVSPPRDQNR--NQGGRVFINVAPGARIAIHALAIDLGTEANQT--                                                                     | SDSYIS                                                                     | IRD--            | HNMKMITFHGQQLVWYSEG-----SRAEIEFSQFQEDN-----        |
| 224073646_Tgu_LOC100226372     | 1105 | -ATKYYQDCDQQLFGPQGEIVAPVER----QEGVCRFTIVAPRQIRISIRALNTDLGPEGNQT--                                                                      | DFNYIL                                                                     | VRD--            | STMKTVVFRGQQLVWQSTG-----SQAEIEFHENVKDHR-----       |
| 118099369_Gga_ADAMTS13         | 822  | -AIKYYQDCDQQLFGPQGEIVNPTQSPGQN--QEVVCRFTINVAPQHIIAIRGLYVDLSHESNQT--                                                                    | HFNYIL                                                                     | IRD--            | STMKTMVFRGQQLVWQSTG-----SQAEIEFHENIKDHQ-----       |
| 268556522_Cbr_CBG008530        | 1074 | -----TCDYTMTPSGSLVFNPDMGT----KYDKCEYHIAVHDNRRILLKMNMTLPC-----                                                                          | GKSSL                                                                      | SFRNGPT          | ETSPFSLIPPEVCTPQVN----YMPMIRSFNSRVTIVFKSVNTEG----- |
| 195442916_Dwi_Dwil_GK24548     | 1008 | -----CGSNMTPGVGTIASSML-----TTNCDWHIEVNAGRKIDITIQYAKINMNIT--                                                                            | CPSYGL                                                                     | IY--             | DGLDNAAPLMVNGKFCNRH-----DFATENYRSGS-----           |
| 3318759_Ssc_1SPPB              | 8    | -ARINGPDECGRVIKDTSGISNTDRQ-----KNLCTWITLMPKPDQKVRMAIPYLNLC-----                                                                        | GKEYVE                                                                     | VFDGLL           | SGPSYGKLCAGAAIVFLST-----ANTMTIKYNRISGNSS-----      |
| 1SPPB_Sec_Struct               |      | -EEEE-----EEE--EEEEEEE-----EEEEEEEE-----EEEEEEEE-----                                                                                  | EEEEEE                                                                     | -----            | EEEEEEEEEEEEEEEE-----EEEEEEEE-----                 |
| Jpred prediction               |      | -----EEEE-----EEEEEEEE-----EEEEEEEE-----EEEEEEEE-----                                                                                  | EEEEEE                                                                     | -----            | EEEEEEEE-----EEEEEEEE-----                         |
| consensus/95%                  |      | .....p.....l.....h.....l.....h.....l.....h.....                                                                                        | .....l.....h.....                                                          | .....            | .....h.....                                        |
| consensus/90%                  |      | .....s.....ls.....s.....hph.l.s.....pl.h.h.....p.....l.....hb.....p.....s.....sph.....h.....h.....                                     | .....l.....hb.....p.....s.....sph.....                                     | .....            | .....h.....h.....                                  |
| consensus/85%                  |      | .....ss.G.lssssb.....Cph.I.s.....pl.h.h.....p.....s.....l.....hb.....p.....s.....sphph.....p.....hb.....a.s.....                       | .....s.....l.....hb.....p.....s.....sphph.....                             | .....            | .....hb.....a.s.....                               |
| consensus/80%                  |      | .....us.G.lssssb.....Cph.Ips.....pl.h.h.....sh.....p.s.l.lbs.....p.....p.....s.....sphphb.p.....p.....hb.ba.s.....                     | .....p.....s.....l.....lbs.....p.....p.....s.....sphphb.p.....             | .....            | .....hb.ba.s.....                                  |
| consensus/75%                  |      | .....s.....us.G.lssssb.....Cph.Ipsss.+l.l.h.....sh.....p.s.l.lbs.....s.ps..bp.....hb.ppps.....sphphba.p.....p.....shsbsy.s.s.....      | .....p.....s.....l.....lbs.....s.....ps..bp.....hb.ppps.....sphphba.p..... | .....            | .....shsbsy.s.s.....                               |
| consensus/70%                  |      | .....ss.....us.GpIsusbs.s.....ssCph.Ipsss.+l.lph.....shsp.....s.sbl.lb.....s.ps.sbps.....shbhsps.....sphphbapps.p.....sshsbsy.s.s..... | .....s.....ps.sbps.....shbhsps.....sphphbapps.p.....                       | .....            | .....sshsbsy.s.s.....                              |

Legend:  
 Sko: *Saccoglossus kowalevskii*, Tca: *Tribolium castaneum*, Isc: *Ixodes scapularis*, Hma: *Hydra magnipapillata*, Rno: *Rattus norvegicus*  
 Cel: *Caenorhabditis elegans*, Spu: *Strongylocentrotus purpuratus*, Bfl: *Branchiostoma floridae*, Hsa: *Homo sapiens*, Cja: *Callithrix jacchus*  
 Ame: *Ailuropoda melanoleuca*, Bta: *Bos taurus*, Ocu: *Oryctolagus cuniculus*, Mmu: *Mus musculus*, Mdo: *Monodelphis domestica*, Tgu: *Taeniopygia guttata*  
 Gga: *Gallus gallus*, Cbr: *Caenorhabditis briggsae*, Dwi: *Drosophila willistoni*, Ssc: *Sus scrofa*

- a: Aromatic residue
- b: Bulky residue
- C: Cysteine
- G: Glycine
- h: Hydrophobic residue
- l: Leucine or Isoleucine
- p: Polar residue
- s: Small residue
- u: Uncharged residue
- Y: Tyrosine

# Figure S3: Structural similarities between CUB domain, B1 domain of neuropilin-2 and Nucleoplasmins

CUB domain of major seminal plasma glycoprotein psp-II

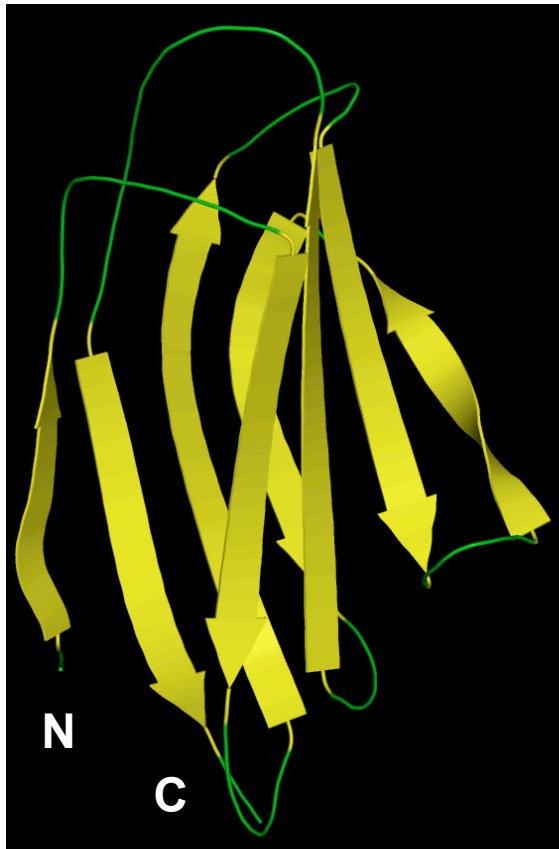

PDB: 1spp, Chain B

B1 domain of Neuropilin-2

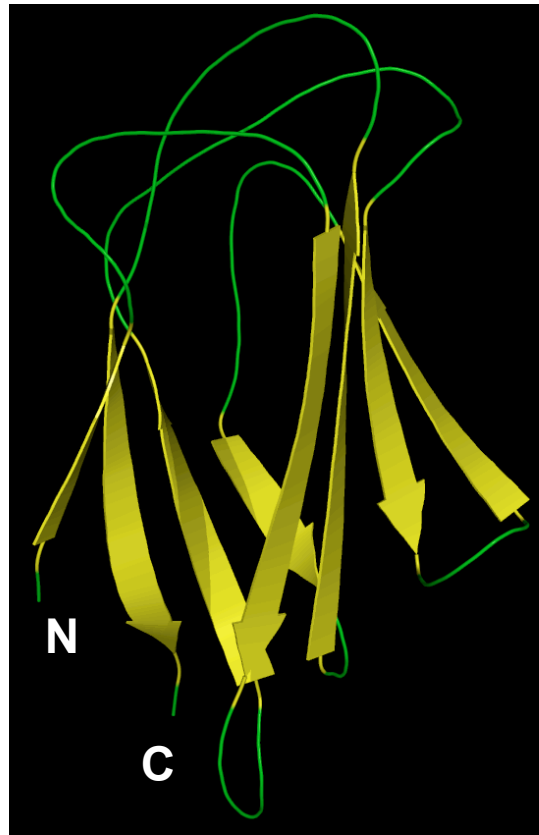

PDB: 2qq1, Chain A

Drosophila NLP-core (Nucleoplasmin family)

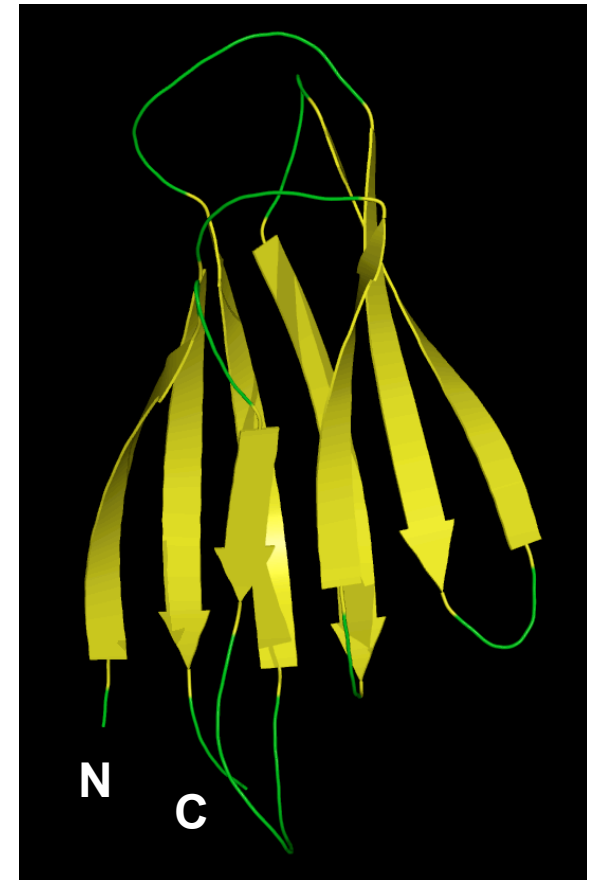

PDB: 1nlq, Chain A

**Table S1: DALI structural hits for query CUB domain structures**

| <b>Protein domain</b>                                                            | <b>PDB code</b>      | <b>Dali Z-score</b> |
|----------------------------------------------------------------------------------|----------------------|---------------------|
| <b>B1 domain of neuropilin-2</b>                                                 | <b>2qql, chain A</b> | <b>13.6</b>         |
| <b>Class 1 collagenase</b>                                                       | <b>1nqd, chain A</b> | <b>7.4</b>          |
| <b>Microvirus capsid protein<br/>Procapsid of bacteriophage phix174</b>          | <b>1cd3, Chain G</b> | <b>6.2</b>          |
| <b>Tumor necrosis factor ligand superfamily<br/>member 4, OX40L</b>              | <b>2hew, Chain F</b> | <b>6.1</b>          |
| <b>Supernatant protein factor (SPF), C-terminal<br/>domain</b>                   | <b>1o6u, Chain E</b> | <b>6.0</b>          |
| <b>Chromatin decondensation protein 1 (Crp1,<br/>Nlp)<br/>Nucleoplasmin-like</b> | <b>1nlq, Chain A</b> | <b>5.6</b>          |
